# Supplementary material for: Mindfulness-Based Cognitive Therapy for Stress Reduction in Family Carers of People Living with Dementia: A Systematic Review
Source: MDPI journal article supplement (doi:10.3390/ijerph19010614), 2022-01-05
Supplement: s1 [file s1]

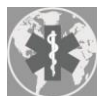

---

**Supplementary Table S1.** MEDLINE search strategy (OVID interface).

---

1. Mindfulness/
  2. mindfulness.ti,ab,kw.
  3. (MBCT or mindfulness based cognitive therapy or MBI or mindfulness based intervention? or MBP or mindfulness based program\* or mindful\*).ti,ab,kw.
  4. or/1-3
  5. Caregivers/
  6. ((famil\* or spous\* or relative? or relation or relations or partner? or husband? or wife or wives or significant other? or child\* or sibling? or grandchild\*) adj5 (care\* or caring or caregiv\* or care giv\*)).ti,ab,kw.
  7. 5 or 6
  8. dementia/ or alzheimer disease/ or dementia, vascular/ or cadasil/ or dementia, multi-infarct/ or frontotemporal lobar degeneration/ or frontotemporal dementia/ or "pick"/ or huntington disease/ or lewy body disease/
  9. dementia.ti,ab,kw.
  10. alzheimer?.ti,ab,kw.
  11. (cognit\* or neurocognit\* or dement\* or cadasil or frontotemporal or fronto temporal or pick? or huntington? or lewy-body or Parkinson? or primary progressive aphasia or carasil or Creutzfeldt Jakob or CJD or sundown\* or Korsakoff or binswanger? or klüber bucy or primary progressive nonfluent aphasia).ti,ab,kw.
  12. or/8-11
  13. 4 and 7 and 12
-
